# Supplementary material for: Impact of post-dialysis calcium level on ex vivo rat aortic wall calcification
Source: PubMed Central journal article supplement (PMC5568142; doi:10.1371/journal.pone.0183730), 2017-08-23
Supplement: pone.0183730.s001.pdf [file pone.0183730.s001.pdf]

**S1 Table Results Fig 1**

Impact of post-dialysis calcium levels on ex vivo rat aortic wall calcification

Daniel Azpiazu, Emilio González-Parra, Alberto Ortiz, Jesús Egado, Ricardo Villa-Bellosta.

| Patient   | Calcium (mmol/L) |        | $\Delta$ Calcium<br>PostHD-PreHD | PTH (pg/mL) |        | $\Delta$ PTH<br>PostHD-PreHD |
|-----------|------------------|--------|----------------------------------|-------------|--------|------------------------------|
|           | PreHD            | PostHD |                                  | PreHD       | PostHD |                              |
| <b>1</b>  | 2,23             | 1,90   | -0,33                            | 88,3        | 56,9   | -31,4                        |
| <b>2</b>  | 2,78             | 2,50   | -0,28                            | 321,1       | 333,1  | 12,0                         |
| <b>3</b>  | 2,23             | 2,00   | -0,23                            | 87,8        | 111,8  | 24,0                         |
| <b>4</b>  | 2,60             | 2,43   | -0,18                            | 622,0       | 1136,9 | 514,9                        |
| <b>5</b>  | 2,35             | 2,20   | -0,15                            | 97,9        | 512,9  | 415,0                        |
| <b>6</b>  | 2,23             | 2,13   | -0,10                            | 443,6       | 246,7  | -196,9                       |
| <b>7</b>  | 2,10             | 2,00   | -0,10                            | 565,2       | 373,1  | -192,1                       |
| <b>8</b>  | 2,23             | 2,18   | -0,05                            | 259,6       | 157,5  | -102,1                       |
| <b>9</b>  | 2,33             | 2,33   | 0,00                             | 17,4        | 7,4    | -10,0                        |
| <b>10</b> | 2,15             | 2,15   | 0,00                             | 501,5       | 615,2  | 113,7                        |
| <b>11</b> | 2,48             | 2,50   | 0,02                             | 19,5        | 14,2   | -5,3                         |
| <b>12</b> | 2,08             | 2,13   | 0,05                             | 443,2       | 469,6  | 26,4                         |
| <b>13</b> | 2,43             | 2,48   | 0,05                             | 110,1       | 100,5  | -9,6                         |
| <b>14</b> | 2,28             | 2,35   | 0,08                             | 139,8       | 139,8  | 0,0                          |
| <b>15</b> | 1,85             | 1,95   | 0,10                             | 78,3        | 217,7  | 139,4                        |
| <b>16</b> | 2,25             | 2,35   | 0,10                             | 81,2        | 16,8   | -64,4                        |
| <b>17</b> | 2,15             | 2,25   | 0,10                             | 226,1       | 171,7  | -54,4                        |
| <b>18</b> | 1,98             | 2,08   | 0,10                             | 189,6       | 178,0  | -11,6                        |
| <b>19</b> | 2,48             | 2,60   | 0,13                             | 155,1       | 17,6   | -137,5                       |
| <b>20</b> | 2,48             | 2,60   | 0,13                             | 549,7       | 1014,5 | 464,8                        |
| <b>21</b> | 2,13             | 2,28   | 0,15                             | 88,7        | 40,7   | -48,0                        |
| <b>22</b> | 2,30             | 2,45   | 0,15                             | 173,6       | 41,4   | -132,2                       |
| <b>23</b> | 2,05             | 2,20   | 0,15                             | 201,6       | 275,1  | 73,5                         |
| <b>24</b> | 2,30             | 2,45   | 0,15                             | 339,0       | 502,7  | 163,7                        |
| <b>25</b> | 2,20             | 2,38   | 0,18                             | 965,8       | 344,5  | -621,3                       |
| <b>26</b> | 2,23             | 2,40   | 0,18                             | 251,7       | 40,9   | -210,8                       |
| <b>27</b> | 2,15             | 2,33   | 0,18                             | 1665,9      | 550,2  | -1115,7                      |
| <b>28</b> | 2,15             | 2,33   | 0,18                             | 94,1        | 33,4   | -60,7                        |
| <b>29</b> | 2,35             | 2,55   | 0,20                             | 348,5       | 120,8  | -227,7                       |
| <b>30</b> | 2,20             | 2,40   | 0,20                             | 166,3       | 45,5   | -120,8                       |
| <b>31</b> | 2,10             | 2,30   | 0,20                             | 472,8       | 644,6  | 171,8                        |
| <b>32</b> | 2,15             | 2,35   | 0,20                             | 352,1       | 148,0  | -204,1                       |
| <b>33</b> | 2,25             | 2,45   | 0,20                             | 108,0       | 22,9   | -85,1                        |
| <b>34</b> | 2,15             | 2,35   | 0,20                             | 76,7        | 19,9   | -56,8                        |
| <b>35</b> | 2,30             | 2,50   | 0,20                             | 15,0        | 7,4    | -7,6                         |
| <b>36</b> | 2,33             | 2,55   | 0,23                             | 90,6        | 33,5   | -57,1                        |
| <b>37</b> | 2,30             | 2,53   | 0,23                             | 424,1       | 160,2  | -263,9                       |
| <b>38</b> | 2,00             | 2,23   | 0,23                             | 142,3       | 98,7   | -43,6                        |
| <b>39</b> | 2,28             | 2,53   | 0,25                             | 443,3       | 292,3  | -151,0                       |
| <b>40</b> | 2,23             | 2,53   | 0,30                             | 366,0       | 105,3  | -260,7                       |
| <b>41</b> | 2,20             | 2,50   | 0,30                             | 200,1       | 30,3   | -169,8                       |

|           |      |      |      |        |       |        |
|-----------|------|------|------|--------|-------|--------|
| <b>42</b> | 2,05 | 2,35 | 0,30 | 473,5  | 304,1 | -169,4 |
| <b>43</b> | 2,43 | 2,73 | 0,30 | 113,3  | 106,3 | -7,0   |
| <b>44</b> | 2,23 | 2,55 | 0,33 | 139,6  | 31,0  | -108,6 |
| <b>45</b> | 2,15 | 2,48 | 0,33 | 280,5  | 101,6 | -178,9 |
| <b>46</b> | 2,20 | 2,55 | 0,35 | 425,1  | 122,9 | -302,2 |
| <b>47</b> | 2,08 | 2,43 | 0,35 | 353,6  | 53,5  | -300,1 |
| <b>48</b> | 2,25 | 2,60 | 0,35 | 977,5  | 317,7 | -659,8 |
| <b>49</b> | 2,00 | 2,35 | 0,35 | 1244,7 | 721,5 | -523,2 |
| <b>50</b> | 1,98 | 2,33 | 0,35 | 468,6  | 76,3  | -392,3 |
| <b>51</b> | 2,13 | 2,48 | 0,35 | 143,8  | 65,6  | -78,2  |
| <b>52</b> | 2,03 | 2,40 | 0,38 | 745,7  | 208,9 | -536,8 |
| <b>53</b> | 2,35 | 2,73 | 0,38 | 562,4  | 205,1 | -357,3 |
| <b>54</b> | 2,10 | 2,48 | 0,38 | 246,5  | 60,2  | -186,3 |
| <b>55</b> | 2,33 | 2,73 | 0,40 | 609,3  | 333,5 | -275,8 |
| <b>56</b> | 2,35 | 2,75 | 0,40 | 298,9  | 102,6 | -196,3 |
| <b>57</b> | 2,05 | 2,45 | 0,40 | 396,3  | 148,6 | -247,7 |
| <b>58</b> | 2,28 | 2,70 | 0,43 | 379,3  | 633,4 | 254,1  |
| <b>59</b> | 2,10 | 2,55 | 0,45 | 686,0  | 327,1 | -358,9 |
| <b>60</b> | 1,85 | 2,30 | 0,45 | 474,0  | 143,2 | -330,8 |
| <b>61</b> | 2,10 | 2,55 | 0,45 | 110,0  | 61,4  | -48,6  |
| <b>62</b> | 1,85 | 2,33 | 0,48 | 662,2  | 243,5 | -418,7 |
| <b>63</b> | 1,93 | 2,45 | 0,53 | 364,3  | 370,1 | 5,8    |
| <b>64</b> | 2,08 | 2,63 | 0,55 | 563,5  | 118,4 | -445,1 |
| <b>65</b> | 2,00 | 2,55 | 0,55 | 328,0  | 78,7  | -249,3 |
| <b>66</b> | 2,08 | 2,70 | 0,63 | 521,7  | 151,9 | -369,8 |
| <b>67</b> | 2,20 | 2,94 | 0,74 | 377,0  | 161,0 | -216,0 |
| <b>68</b> | 1,73 | 2,50 | 0,78 | 547,9  | 163,8 | -384,1 |
