# Supplementary material for: Impact of post-dialysis calcium level on ex vivo rat aortic wall calcification
Source: PubMed Central journal article supplement (PMC5568142; doi:10.1371/journal.pone.0183730), 2017-08-23
Supplement: pone.0183730.s002.pdf [file pone.0183730.s002.pdf]

**S2 Table Calcium deposition**

Impact of post-dialysis calcium levels on ex vivo rat aortic wall calcification

Daniel Azpiazu, Emilio González-Parra, Alberto Ortiz, Jesús Egido, Ricardo Villa-Bellosta.

| 1.1     | 1.3     | 1.1     | 2.1      | 2.4      | 2.1      | Ca (mmol/L)  |
|---------|---------|---------|----------|----------|----------|--------------|
| 2.5     | 1.5     | 1.5     | 2.5      | 1.5      | 1.5      | Pi (mmol/L)  |
| 263,659 | 331,812 | 99,732  | 1606,790 | 1108,570 | 1393,662 | Experiment 1 |
| 232,378 | 325,082 | 109,613 | 1641,835 | 1122,695 | 1432,180 |              |
| 307,987 | 344,009 | 80,712  | 1994,944 | 1816,155 | 825,329  |              |
| 168,487 | 299,155 | 75,010  | 910,111  | 1414,365 | 776,695  |              |
| 360,131 | 331,400 | 72,220  | 955,937  | 1441,276 | 767,197  |              |
| 229,143 | 310,021 | 70,092  | 909,542  | 1422,567 | 882,078  | Experiment 2 |
| 352,954 | 517,609 | 62,279  | 884,852  | 1393,043 | 700,846  |              |
| 218,299 | 270,650 | 96,856  | 966,513  | 1460,848 | 780,964  |              |
| 270,046 | 341,343 | 102,776 | 1977,697 | 1785,563 | 811,226  |              |
| 237,914 | 333,857 | 109,585 | 1877,213 | 2493,166 | 681,843  |              |
| 322,863 | 350,958 | 81,508  | 1887,379 | 2489,085 | 779,881  | Experiment 3 |
| 175,494 | 314,537 | 76,559  | 1872,637 | 2469,965 | 760,245  |              |
| 368,078 | 336,324 | 72,910  | 1640,925 | 1121,937 | 1309,291 |              |
| 233,930 | 317,742 | 72,338  | 973,679  | 1465,267 | 880,437  |              |
| 359,494 | 526,982 | 63,096  | 1993,249 | 1812,968 | 726,788  |              |
| 226,522 | 281,942 | 97,482  |          |          |          |              |
